# Supplementary material for: Codon Optimization Enables the Geneticin Resistance Gene to Be Applied Efficiently to the Genetic Manipulation of the Plant Pathogenic Fungus Botrytis cinerea
Source: MDPI journal article supplement (doi:10.3390/plants13020324), 2024-01-22
Supplement: s1 [file s1]

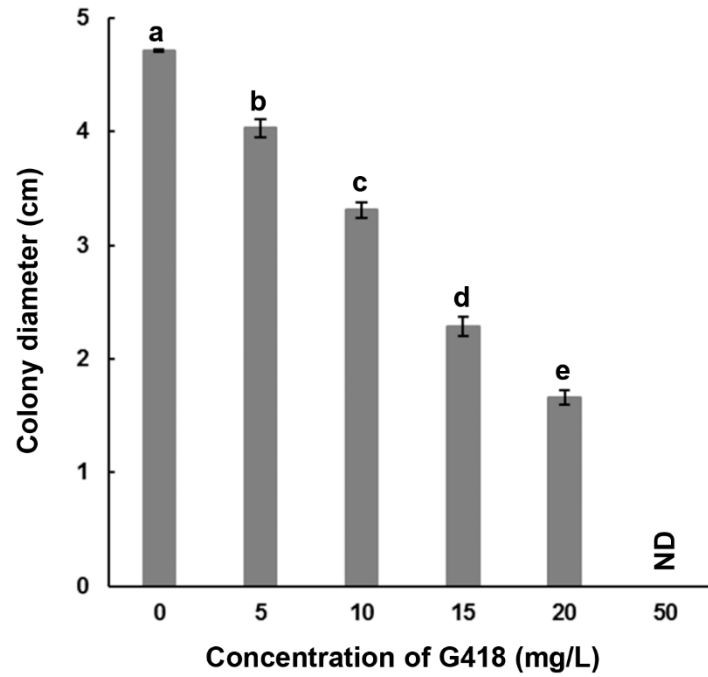

**Figure S1.** Quantification of the radial growth (in diameter) of B05.10 at 3 days post inoculation (DPI) on PDA plates supplemented with different concentrations of G418. ND: Not detected. Data represent means  $\pm$  standard deviations (SD) from three independent experiments in which triplicate colonies were analyzed for each treatment. The letters above columns indicate significant differences analyzed with SPSS software at  $p < 0.05$ .

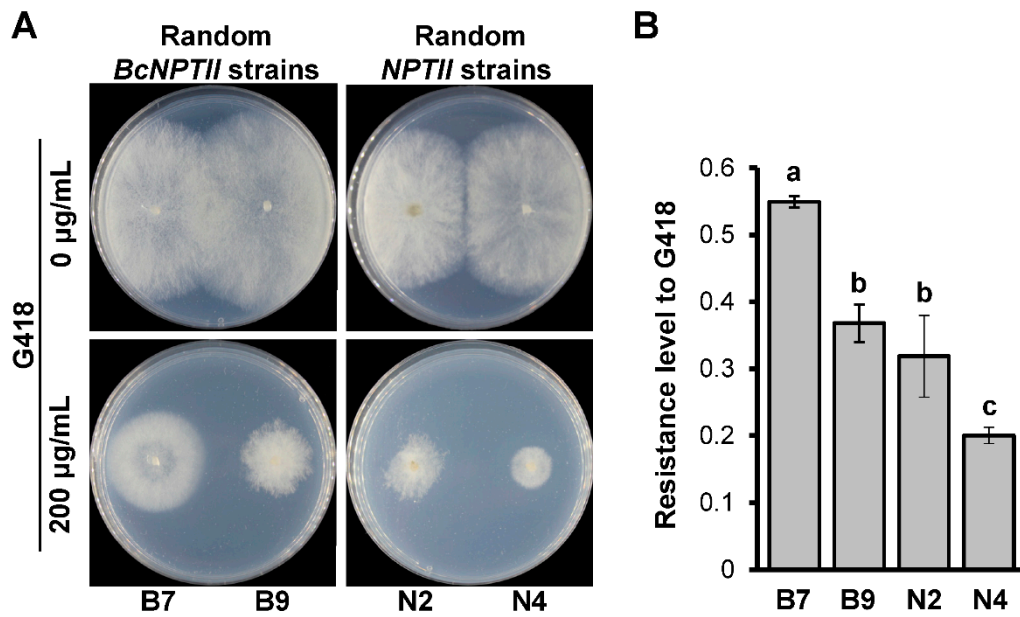

**Figure S2.** The transformants derived from the codon-optimized gene *BcNPTII* show varying degrees of increased resistance to geneticin. (A) Mycelial plugs of 4 randomly selected geneticin-resistant transformants were inoculated on PDA plates supplemented with or without G418. Photographs were taken at 2 DPI. (B) Quantification of the resistance levels of 4 randomly selected transformants derived from different resistance genes. The resistance level of a strain is reflected by calculating the percentage of the colony size with G418 compared to that without G418. The letters above columns indicate significant differences analyzed with SPSS software at  $p < 0.05$ . B7 and B9 were derived from *BcNPTII* transformation; N2 and N4 were derived from *NPTII* transformation.

**Table S1.** Codon usage of fungal genes and the two geneticin resistance genes

| Parameter             | Value for indicated organism or gene <sup>a</sup> |                            |                              |                               |                                  |                             |               |                |
|-----------------------|---------------------------------------------------|----------------------------|------------------------------|-------------------------------|----------------------------------|-----------------------------|---------------|----------------|
|                       | <i>M.</i><br><i>oryzae</i>                        | <i>N.</i><br><i>crassa</i> | <i>A.</i><br><i>gossypii</i> | <i>F.</i><br><i>oxysporum</i> | <i>S.</i><br><i>sclerotiorum</i> | <i>B.</i><br><i>cinerea</i> | <i>NPTII</i>  | <i>BcNPTII</i> |
| Coding GC content (%) | 56.3                                              | 56.1                       | 52.8                         | 51.2                          | 47.6                             | 46.6                        | 59%           | 48%            |
| Codon usage (%)       |                                                   |                            |                              |                               |                                  |                             |               |                |
| Ala                   |                                                   |                            |                              |                               |                                  |                             |               |                |
| GCT                   | 19.9                                              | 24.3                       | 19.0                         | 39.5                          | 38.2                             | 34.2                        | 26(9)         | 40(14)         |
| GCC                   | 42.8                                              | 41.4                       | 25.4                         | 40.2                          | 26                               | 24.1                        | 34(12)        | 29(10)         |
| GCA                   | 18.1                                              | 14.5                       | 21.8                         | 7.9                           | 27.4                             | 29.6                        | 17(6)         | 31(11)         |
| GCG                   | 19.3                                              | 19.9                       | 33.8                         | 12.4                          | 8.3                              | 12                          | <b>23(8)</b>  | 0              |
| Arg                   |                                                   |                            |                              |                               |                                  |                             |               |                |
| AGA                   | 9.3                                               | 12.8                       | 15.7                         | 20.2                          | 27.9                             | 27.1                        | 0             | 40(8)          |
| AGG                   | 18.5                                              | 19.1                       | 14.2                         | 6.0                           | 10.8                             | 10.2                        | 15(3)         | 0              |
| CGT                   | 14.6                                              | 14.4                       | 12.5                         | 15.5                          | 23.2                             | 20.2                        | 10(2)         | 25(5)          |
| CGC                   | 30.9                                              | 28.5                       | 28.4                         | 35.2                          | 13.8                             | 14.6                        | <b>40(8)</b>  | 0              |
| CGA                   | 12.8                                              | 11.4                       | 6.5                          | 23.2                          | 19.8                             | 21.1                        | 5(1)          | 35(7)          |
| CGG                   | 13.9                                              | 13.8                       | 22.7                         | 0.0                           | 4.4                              | 6.8                         | <b>30(6)</b>  | 0              |
| Asn                   |                                                   |                            |                              |                               |                                  |                             |               |                |
| AAT                   | 23.8                                              | 27.7                       | 39.1                         | 17.2                          | 43.4                             | 51.9                        | 100(3)        | 67(2)          |
| AAC                   | 76.2                                              | 72.4                       | 60.9                         | 82.8                          | 56.6                             | 48.1                        | 0             | 33(1)          |
| Asp                   |                                                   |                            |                              |                               |                                  |                             |               |                |
| GAT                   | 35.6                                              | 42.4                       | 42.1                         | 44.1                          | 69.2                             | 66.5                        | 48(12)        | 68(17)         |
| GAC                   | 64.4                                              | 57.6                       | 57.9                         | 55.9                          | 30.8                             | 33.5                        | 52(13)        | 32(8)          |
| Cys                   |                                                   |                            |                              |                               |                                  |                             |               |                |
| TGT                   | 27                                                | 30.3                       | 35.8                         | 31.7                          | 46.7                             | 53.1                        | 20(1)         | 60(3)          |
| TGC                   | 73                                                | 69.7                       | 64.2                         | 68.3                          | 53.3                             | 46.9                        | 80(4)         | 40(2)          |
| Glu                   |                                                   |                            |                              |                               |                                  |                             |               |                |
| GAA                   | 29.8                                              | 34.5                       | 36.9                         | 17.0                          | 53.1                             | 54.7                        | 56(10)        | 56(10)         |
| GAG                   | 70.2                                              | 65.5                       | 63.1                         | 83.0                          | 46.9                             | 45.3                        | 44(8)         | 44(8)          |
| Gln                   |                                                   |                            |                              |                               |                                  |                             |               |                |
| CAA                   | 36                                                | 39.4                       | 29.1                         | 19.2                          | 71.8                             | 67.7                        | 27(3)         | 73(8)          |
| CAG                   | 64                                                | 60.6                       | 70.9                         | 80.8                          | 28.2                             | 32.3                        | <b>73(8)</b>  | 27(3)          |
| Gly                   |                                                   |                            |                              |                               |                                  |                             |               |                |
| GGT                   | 23.4                                              | 25.5                       | 21.9                         | 35.4                          | 43.7                             | 35.7                        | 24(5)         | 43(9)          |
| GGC                   | 45.8                                              | 40.4                       | 40.1                         | 44.8                          | 16.1                             | 20.9                        | <b>48(10)</b> | 14(3)          |
| GGA                   | 18                                                | 18.9                       | 15.0                         | 17.5                          | 34.3                             | 33.4                        | 14(3)         | 43(9)          |
| GGG                   | 12.7                                              | 15.2                       | 23.1                         | 2.3                           | 6                                | 10.1                        | 14(3)         | 0              |
| His                   |                                                   |                            |                              |                               |                                  |                             |               |                |
| CAT                   | 31.8                                              | 39.0                       | 41.7                         | 48.4                          | 50.2                             | 58.2                        | 57(4)         | 57(4)          |
| CAC                   | 68.2                                              | 61.0                       | 58.3                         | 51.6                          | 49.8                             | 41.8                        | 43(3)         | 43(3)          |

Continued on the following page

| Parameter |     | Value for indicated organism or gene <sup>a</sup> |                     |                       |                        |                           |                      |               |                |
|-----------|-----|---------------------------------------------------|---------------------|-----------------------|------------------------|---------------------------|----------------------|---------------|----------------|
|           |     | M.<br><i>oryzae</i>                               | N.<br><i>crassa</i> | A.<br><i>gossypii</i> | F.<br><i>oxysporum</i> | S.<br><i>sclerotiorum</i> | B.<br><i>cinerea</i> | <i>NPTII</i>  | <i>BcNPTII</i> |
| Ile       | ATT | 30.5                                              | 31.4                | 33.9                  | 37.6                   | 38.3                      | 44.8                 | 20(2)         | 60(6)          |
|           | ATC | 56.4                                              | 59.4                | 43.1                  | 61.4                   | 51.3                      | 39.6                 | 70(7)         | 40(4)          |
|           | ATA | 13                                                | 9.2                 | 23.0                  | 1.1                    | 10.4                      | 15.6                 | 10(1)         | 0              |
| Leu       | TTA | 3.7                                               | 3.3                 | 8.2                   | 3.1                    | 11.4                      | 11.4                 | 0             | 0              |
|           | TTG | 15.3                                              | 18                  | 19.4                  | 20.3                   | 23.5                      | 23.2                 | 13(4)         | 28(9)          |
|           | CTT | 15.2                                              | 17.2                | 12.6                  | 22.3                   | 25.4                      | 24.4                 | 25(8)         | 59(19)         |
|           | CTC | 30.3                                              | 32.3                | 15.8                  | 34.9                   | 25.5                      | 20.7                 | 19(6)         | 13(4)          |
|           | CTA | 6.4                                               | 7.2                 | 13                    | 2.3                    | 6.5                       | 9.5                  | 9(3)          | 0              |
|           | CTG | 28.9                                              | 22                  | 31                    | 17.2                   | 7.7                       | 10.7                 | <b>34(11)</b> | 0              |
| Lys       | AAA | 24.7                                              | 22.5                | 31.0                  | 7.5                    | 37.3                      | 45.7                 | 50(2)         | 50(2)          |
|           | AAG | 75.3                                              | 77.6                | 69.0                  | 92.5                   | 62.7                      | 54.3                 | 50(2)         | 50(2)          |
| Phe       | TTT | 38.4                                              | 34.8                | 42.2                  | 21.9                   | 30.8                      | 41.8                 | 18(2)         | 55(6)          |
|           | TTC | 61.6                                              | 65.2                | 57.8                  | 78.1                   | 69.2                      | 58.2                 | 82(9)         | 45(5)          |
| Pro       | CCT | 21                                                | 23.4                | 20.7                  | 36.9                   | 34.6                      | 31.6                 | 18(2)         | 45(5)          |
|           | CCC | 31.8                                              | 34.8                | 21.9                  | 39.0                   | 14                        | 17.9                 | 18(2)         | 0              |
|           | CCA | 21.1                                              | 19.2                | 25.8                  | 19.4                   | 42.3                      | 39.1                 | 18(2)         | 55(6)          |
|           | CCG | 26.1                                              | 22.6                | 31.6                  | 4.7                    | 9.1                       | 11.4                 | <b>45(5)</b>  | 0              |
| Ser       | AGT | 8.3                                               | 10.6                | 10.1                  | 10.3                   | 13.7                      | 16.3                 | 0             | 20(2)          |
|           | AGC | 24.9                                              | 21.3                | 20.8                  | 23.2                   | 12.8                      | 12.9                 | 0             | 0              |
|           | TCT | 13.6                                              | 14.6                | 17.2                  | 23.7                   | 22.5                      | 22.8                 | 40(4)         | 40(4)          |
|           | TCC | 18                                                | 24.4                | 18.4                  | 25.1                   | 26.4                      | 16.6                 | 20(2)         | 20(2)          |
|           | TCA | 12.5                                              | 11.3                | 11.9                  | 7.6                    | 14.7                      | 19.4                 | 20(2)         | 20(2)          |
|           | TCG | 22.7                                              | 17.7                | 21.6                  | 10.0                   | 9.9                       | 12                   | 20(2)         | 0              |
| Thr       | ACT | 17.4                                              | 18.6                | 20.6                  | 39.6                   | 33.9                      | 31.6                 | 20(2)         | 40(4)          |
|           | ACC | 38                                                | 41.1                | 26.8                  | 40.5                   | 37.5                      | 27.1                 | 40(4)         | 20(2)          |
|           | ACA | 19.6                                              | 17.9                | 22.2                  | 12.7                   | 19.6                      | 28.8                 | 10(1)         | 40(4)          |
|           | ACG | 25                                                | 22.5                | 30.3                  | 7.2                    | 9                         | 12.4                 | <b>30(3)</b>  | 0              |
| Tyr       | TAT | 27.6                                              | 32.7                | 35.6                  | 38.2                   | 45.7                      | 49.3                 | 75(3)         | 50(2)          |
|           | TAC | 72.4                                              | 67.3                | 64.4                  | 61.8                   | 54.3                      | 50.7                 | 25(1)         | 50(2)          |
| Val       | GTT | 21.8                                              | 23.2                | 21.3                  | 37.6                   | 38.4                      | 36.7                 | 19(3)         | 50(8)          |
|           | GTC | 43.5                                              | 41.7                | 24.4                  | 48.5                   | 38.3                      | 31.5                 | 25(4)         | 44(7)          |
|           | GTA | 8.9                                               | 9.1                 | 13.4                  | 1.1                    | 12                        | 16.2                 | 6(1)          | 6(1)           |
|           | GTG | 25.8                                              | 26.0                | 40.9                  | 12.8                   | 11.2                      | 15.6                 | <b>50(8)</b>  | 0              |

<sup>a</sup> Numbers in parentheses indicate codon numbers in geneticin resistance genes. Bold numbers indicate codons mainly used in *NPTII* but underrepresented in *B. cinerea* and *S. sclerotiorum*

compared to other fungi. GC content and codon frequencies of fungal coding sequences were taken from <http://www.kazusa.or.jp/codon/>. The fungi analyzed were as follows: *Magnaporthe oryzae* (*M. oryzae*), *Neurospora crassa* (*N. crassa*), *Ashbya gossypii* (*A. gossypii*), *Fusarium oxysporum* (*F. oxysporum*), *Sclerotinia sclerotiorum* (*S. sclerotiorum*), *Botrytis cinerea* (*B. cinerea*).

Note: A site for the commonly used restriction enzyme *Pst* I was eliminated from the final sequence of *BcNPTII*.
